# Supplementary material for: Leaf water potential of field crops estimated using NDVI in ground-based remote sensing—opportunities to increase prediction precision
Source: PeerJ. 2021 Aug 18;9:e12005. doi: 10.7717/peerj.12005 (PMC8380031; doi:10.7717/peerj.12005)
Supplement: Supplemental Information 4 — Best estimates of the regression coefficients and the associated uncertainties for the linear model Y = mX + c, describing LWP as a function of NDVI for different crops measured on different days in 2018 using either the ordinary least-squares (OLS), or the weighted least-squares (WLS) method. In the OLS method, relevant equations of J. R. Taylor (1982, pages 153–159) were used, while in the WLS method, an Excel spreadsheet developed by B. C. Reed (2010) was used. Also shown are the relative prediction errors based on average values of LWP and NDVI for different regressions, as well as the relative errors of regression coefficients m and c (expressed as %). References: (1) J.R. Taylor. (1982). An Introduction to Error Analysis. University Science Books. Mill Valley, CA. (2) B.C. Reed. (2010). A spreadsheet for linear least-squares fitting with errors in both coordinates. Physics Education 45: 93–96. [file peerj-09-12005-s004.xlsx]

## Sheet: Sheet1
Method	Crop	Date	Irrigation	n	m	c	delta_m	delta_c	mean_NDVI	Mean_LWP	Prediction_errors		%_err_m	%_err_c
wls-xy	Wheat	2018-04-12	Full	8	-28.95	18.03	3.02	2.13	0.6934	-2.04393	2.06664		10.4318	11.8136
wls-xy	Corn	2018-06-07	Deficit	9	31.91	-23.31	3.4	2.32	0.6944	-1.1517	4.06441		10.655	9.95281
wls-xy	Corn	2018-06-07	Full	9	42.17	-31.85	7.76	5.65	0.727	-1.19241	9.46949		18.4017	17.7394
wls-xy	Corn	2018-06-11	Deficit	9	67.45	-44.36	22.41	14.35	0.6319	-1.73834	16.4012		33.2246	32.349
wls-xy	Cotton	2018-08-09	Deficit	9	4.75	-5.34	1.04	0.51	0.4797	-3.06142	0.329548		21.8947	9.55056
wls-xy	Cotton	2018-08-09	Full	9	4.88	-5.64	1.34	0.73	0.5683	-2.8667	0.520293		27.459	12.9433
wls-xy	Cotton	2018-08-09	D+F	18	4.24	-5.19	0.77	0.39	0.524	-2.96824	0.267323		18.1604	7.51445
ols	Wheat	2018-04-12	Full	8	-31.556	19.88	3.63	2.52	0.6934	-2.00093	2.51735		11.5034	12.6761
ols	Corn	2018-06-07	Deficit	9	29.55	-21.71	3.9	2.68	0.6944	-1.19048	4.52604		13.198	12.3445
ols	Corn	2018-06-07	Full	9	28.85	-22.15	10.37	7.54	0.727	-1.17605	12.8217		35.9445	34.0406
ols	Corn	2018-06-11	Deficit	9	23.18	-16.4	7.18	4.55	0.6319	-1.75256	5.18502		30.975	27.7439
ols	Cotton	2018-08-09	Deficit	9	5.51	-5.63	1.56	0.75	0.4797	-2.98685	0.501642		28.3122	13.3215
ols	Cotton	2018-08-09	Full	9	5.05	-5.71	1.49	0.85	0.5683	-2.84008	0.597435		29.505	14.8862
ols	Cotton	2018-08-09	D+F	18	4.07	-5.04	0.93	0.49	0.524	-2.90732	0.336158		22.8501	9.72222
