# Supplementary material for: Leaf water potential of field crops estimated using NDVI in ground-based remote sensing—opportunities to increase prediction precision
Source: PeerJ journal article supplement (doi:10.7717/peerj.12005), 2021-08-18
Supplement: Supplementary_Figure_S4.pdf [file Supplementary_Figure_S4.pdf]

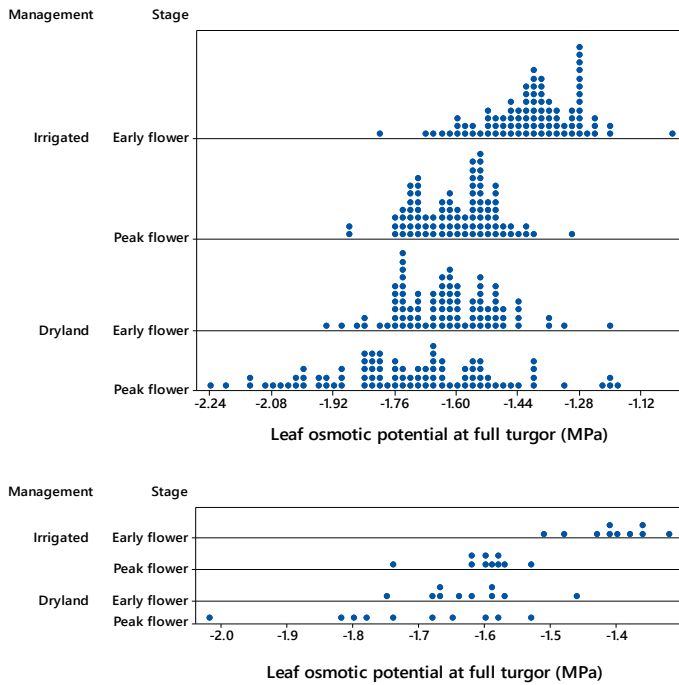

**Figure S4.** Ranges of measured leaf osmotic potentials of ten cotton varieties planted under irrigated and dryland condition in Lytle (irrigated) and Taylor (dryland), TX. Upper panel: dot plot for individual leaf samples. lower panel: dot plot for individual varieties. Source of data: X. Dong and D. A. Mott. (2021). Leaf osmotic potential and morphological traits of 43 cotton varieties growing in a rainfall gradient from southwest to central Texas. In: In Boyd, S., Huffman, M., Krogman, L., and Sarkissian, A., editors, *Proceedings of the 2021 Beltwide Cotton Conferences*. Pages 193-197, Virtual. National Cotton Council of America.
