# Supplementary material for: Leaf water potential of field crops estimated using NDVI in ground-based remote sensing—opportunities to increase prediction precision
Source: PeerJ journal article supplement (doi:10.7717/peerj.12005), 2021-08-18
Supplement: Supplementary_Figure_S5.pdf [file Supplementary_Figure_S5.pdf]

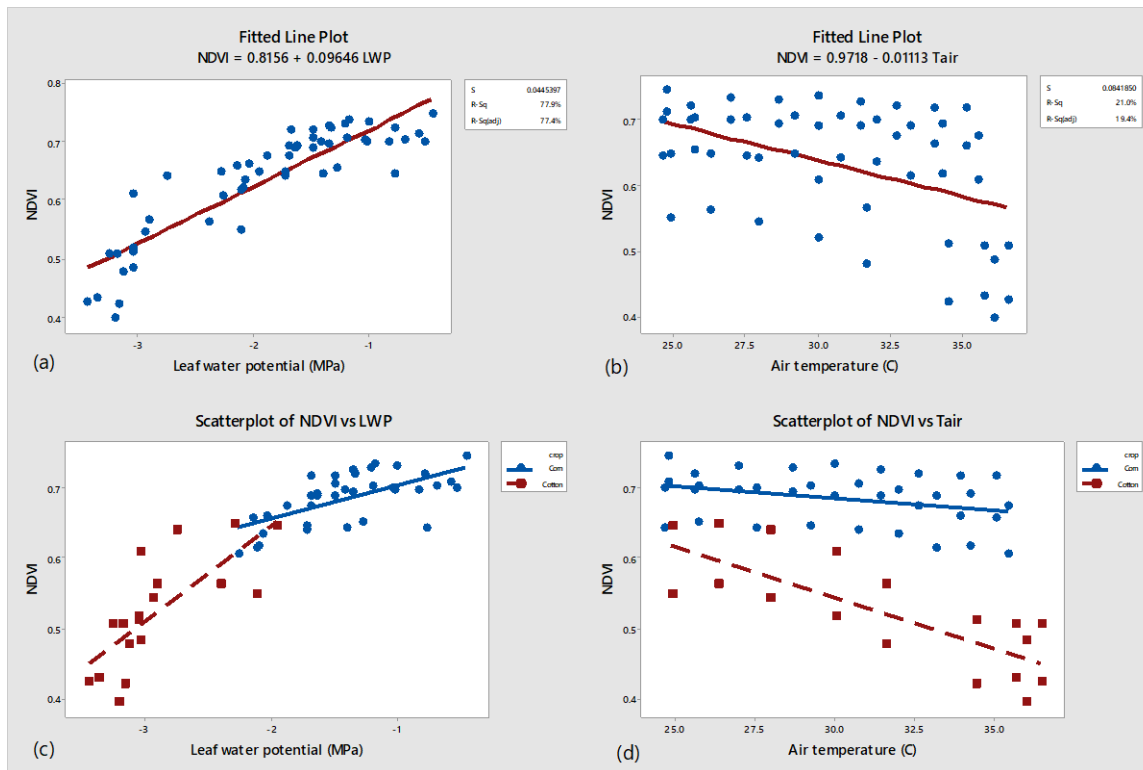

**Figure S5.** A comparison of the relationship between NDVI and leaf water potential (LWP) and that of the NDVI and air temperature (°C) for combined data of corn and cotton measured in 2018.
